# Supplementary material
Source: HighWire-hosted journal article supplement (https://www.jrheum.org/highwire/filestream/29677/field_highwire_adjunct_files/0/140218_DataSuppl.pdf)
Supplement: 140218_DataSuppl.pdf [file 140218_DataSuppl.pdf]

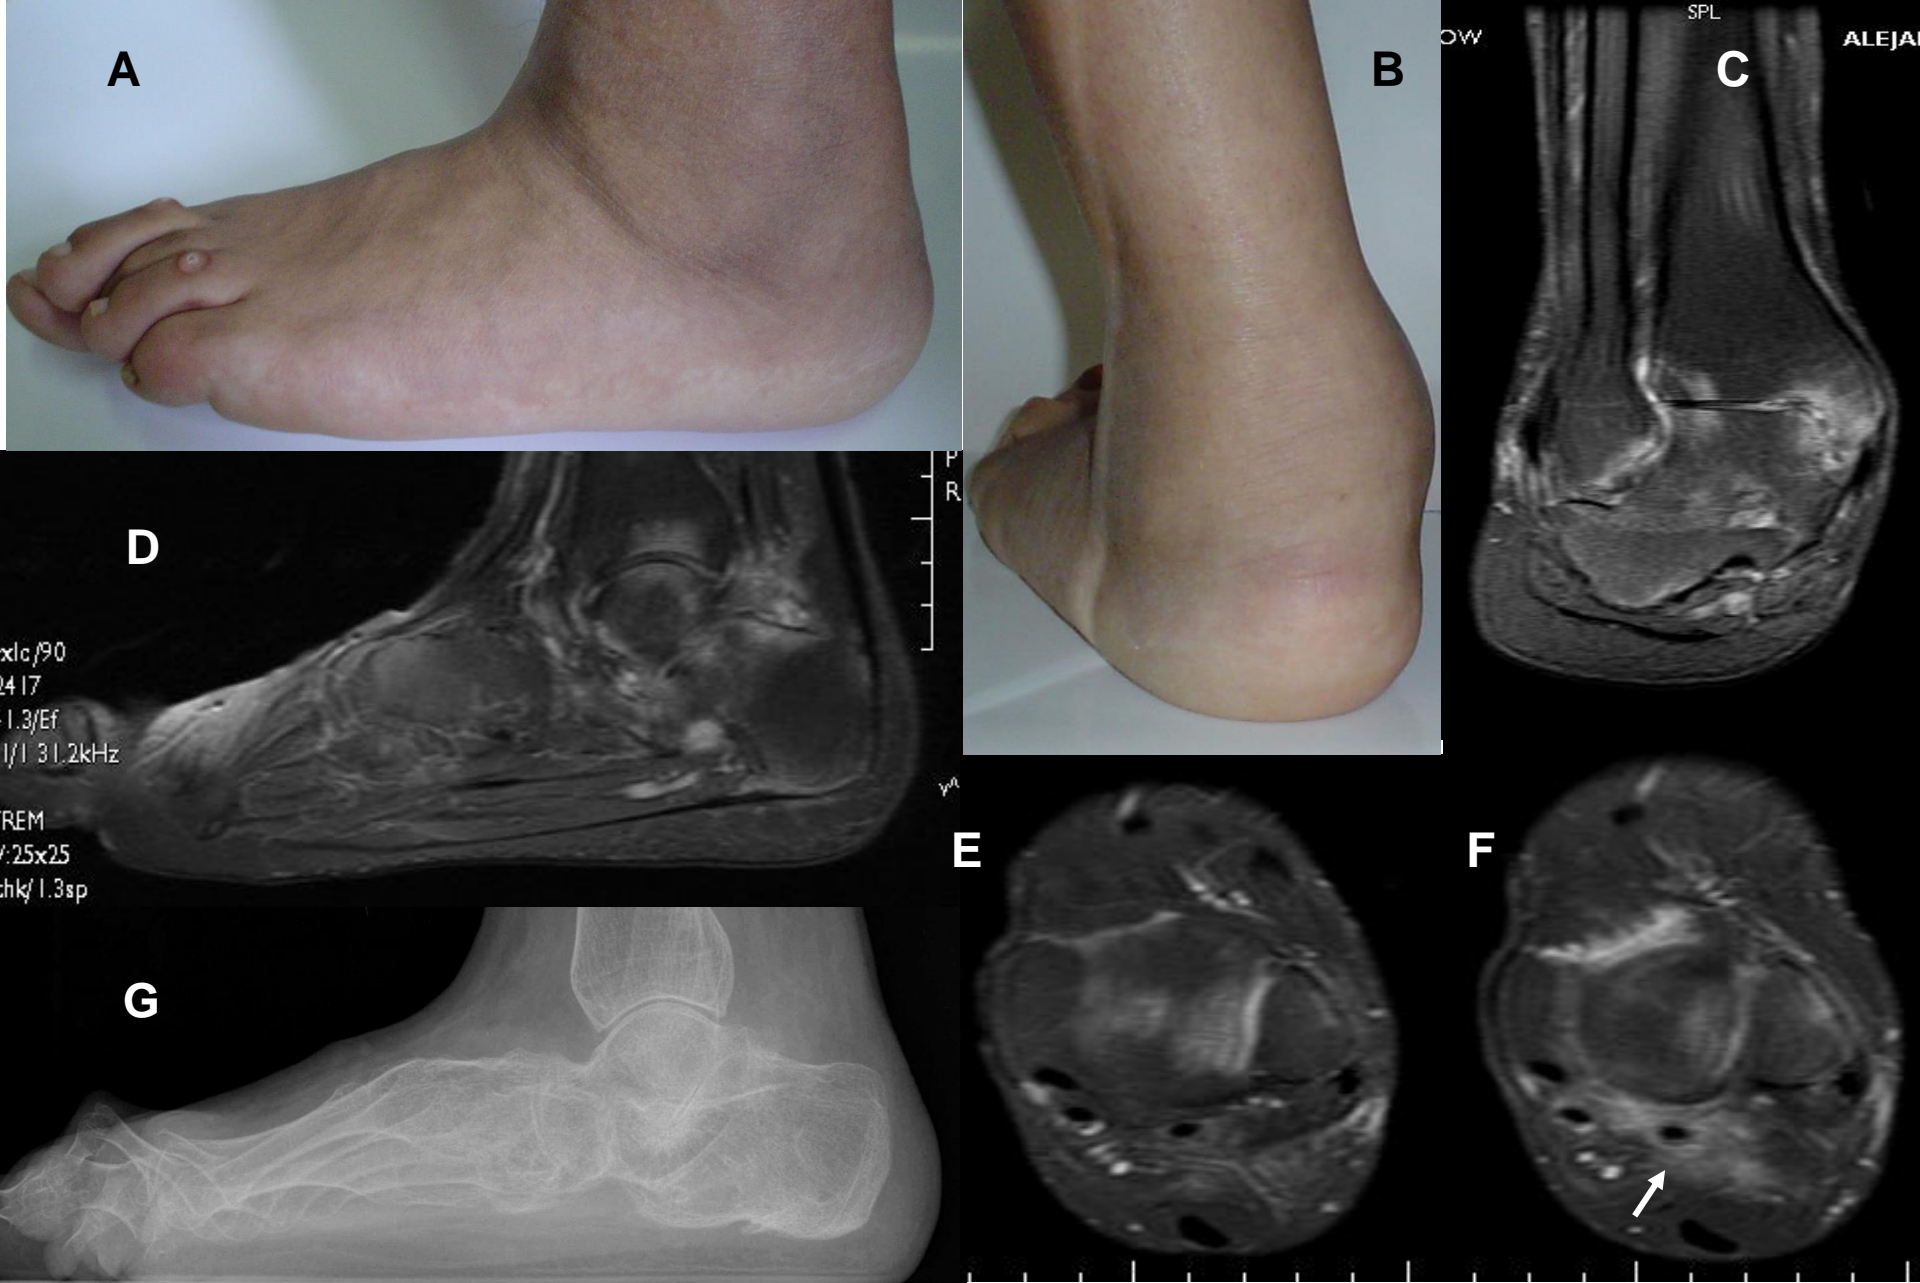

**Supplemental Figure 1.** Combined clinical (A, B), magnetic resonance imaging (MRI) STIR sequence (C-F), and radiograph (G) of a 27-year-old B27+ patient with ankylosing tarsitis (AT) and ankylosing spondylitis. Arrow in F shows edema surrounding tendon sheaths.

Online supplement to: Bone Lineage Proteins in the Enteses of the Midfoot in Patients with Spondyloarthritis.

*The Journal of Rheumatology*; doi:10.3899/jrheum.140218

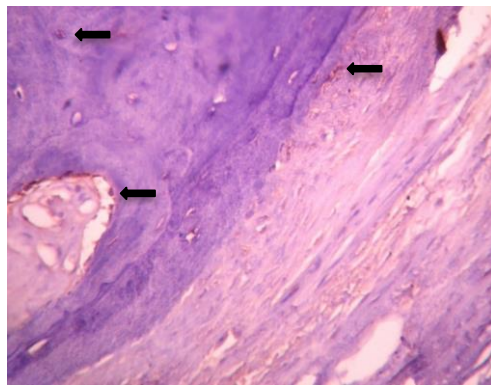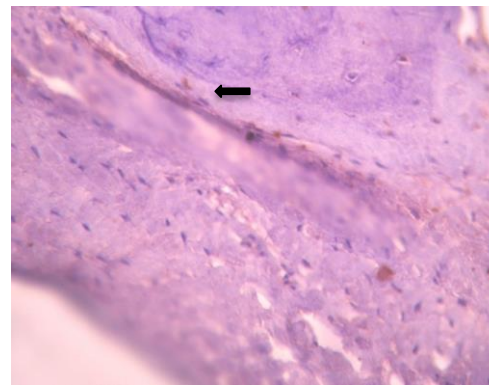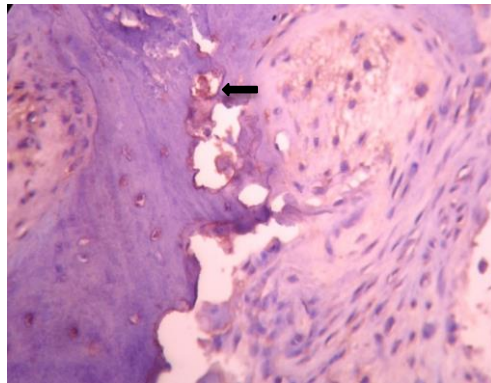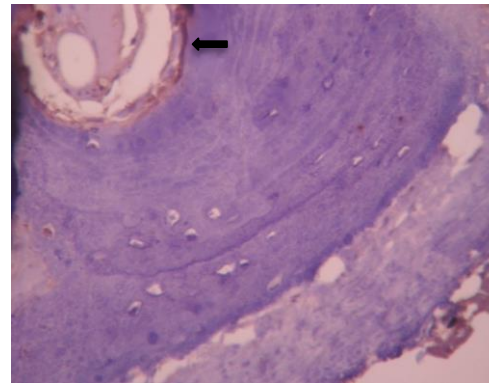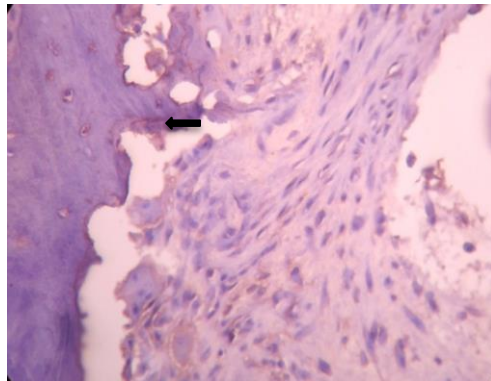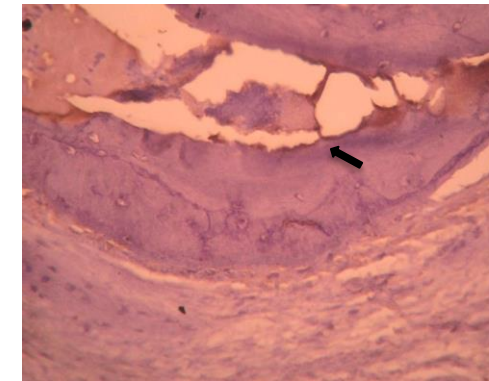

**Supplementary Figure 2.** Osteocalcin detection by immunohistochemistry staining in biopsies of patients without ankylosing tarsitis. Arrows show the positive detection in bone structures.

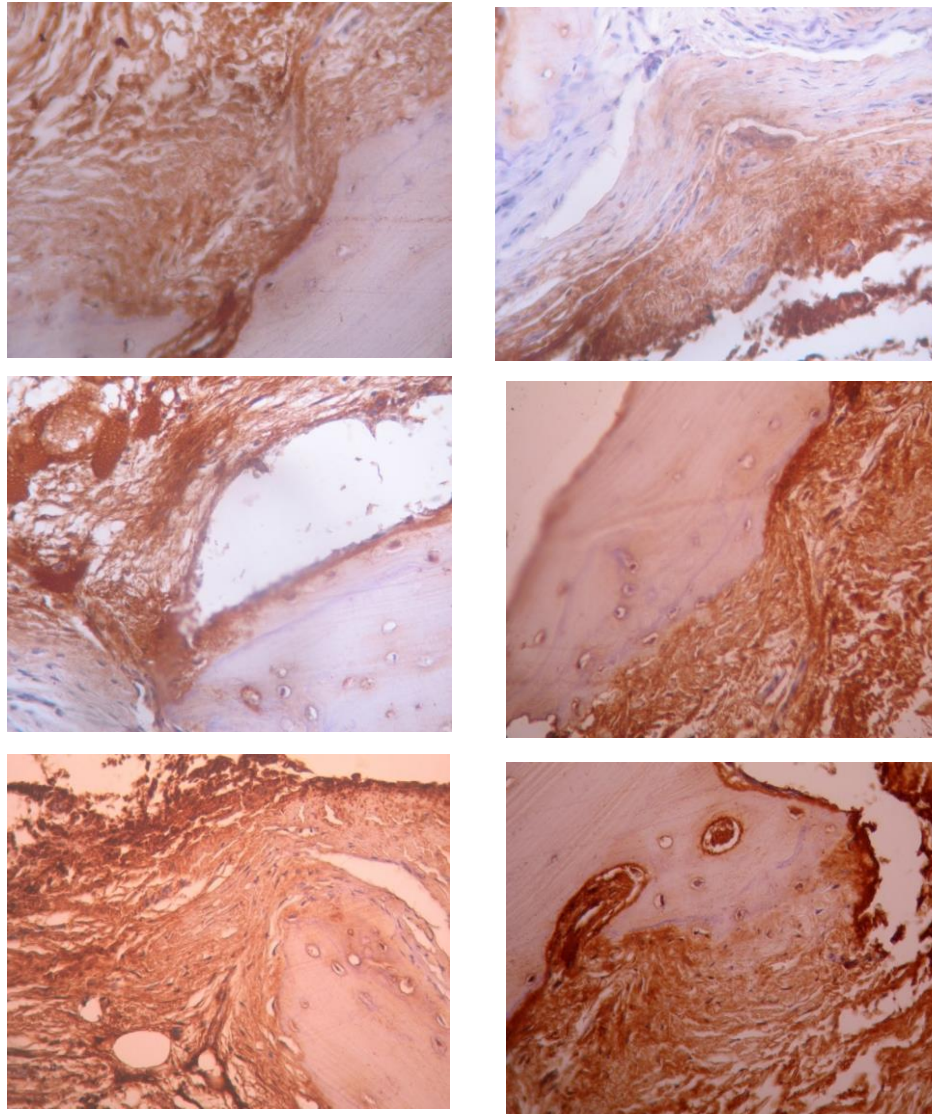

**Supplementary Figure 3.** Osteocalcin (OCN) detection by immunohistochemistry staining in biopsies of patients with ankylosing tarsitis. The OCN is strongly expressed in the bone and entheses.
